# Supplementary material
Source: HighWire-hosted journal article supplement (http://ajnr-stage2.highwire.org/highwire/filestream/52261/field_highwire_adjunct_files/0/2719_table.pdf)
Supplement: 2719_table.pdf [file 2719_table.pdf]

**On-line Table 1: Procedural and follow-up analysis**

|                                                                                              | No.  | %    | No. of Articles Providing These Data |
|----------------------------------------------------------------------------------------------|------|------|--------------------------------------|
| Demographics                                                                                 |      |      |                                      |
| Patients with stent deployed                                                                 | 1457 |      | 37                                   |
| Aneurysms stented                                                                            | 1510 |      | 37                                   |
| % patients stent deployment failed                                                           |      | 3.6  | 35                                   |
| Aneurysms treated with Neuroform 1, 2 and Treo stents                                        | 1017 | 67.4 | 37                                   |
| Aneurysms s/p subarachnoid hemorrhage                                                        | 323  | 22.2 | 37                                   |
| Large aneurysms (>10 mm in most studies)                                                     | 151  | 28.4 | 23                                   |
| Giant aneurysms (>25 mm in all studies)                                                      | 59   | 8.8  | 24                                   |
| Total complications                                                                          | 280  | 19.2 | 37                                   |
| Death                                                                                        | 30   | 2.1  | 37                                   |
| Thromboembolic complications                                                                 | 119  | 9.6  | 36                                   |
| Death                                                                                        | 7    | 0.6  | 36                                   |
| Hemorrhagic complications                                                                    | 27   | 2.2  | 36                                   |
| Death                                                                                        | 11   | 0.9  | 36                                   |
| Technical coil complications                                                                 | 18   | 1.9  | 35                                   |
| Death                                                                                        | 0    | 0.0  | 35                                   |
| Other complications (eg, groin issues, mass effect, infection)                               | 87   | 7.0  | 36                                   |
| Death                                                                                        | 2    | 0.2  | 36                                   |
| Stent-related technical complications                                                        | 92   | 9.3  | 35                                   |
| Stent not delivered                                                                          | 42   | 4.2  | 35                                   |
| Stent problems other than delivery (eg, migration, detachment issues, navigation difficulty) | 50   | 5.0  | 35                                   |
| Aneurysms fully occluded at treatment conclusion                                             | 523  | 45.5 | 32                                   |
| Follow-up: imaging                                                                           |      |      |                                      |
| Patients followed up by imaging                                                              | 695  |      | 23                                   |
| Average duration of follow-up                                                                | 13   |      | 20                                   |
| Median duration of follow-up (mo)                                                            | 6    |      | 17                                   |
| Complete occlusion on follow-up                                                              | 424  | 61.0 | 23                                   |
| Complete occlusion of previously incompletely occluded aneurysm                              | 91   | 22.5 | 18                                   |
| Recanalization of aneurysms initially graded as completely occluded on follow-up             | 93   | 14.0 | 22                                   |
| Retreated aneurysms                                                                          | 62   | 12.9 | 19                                   |
| In-stent stenosis                                                                            | 24   | 3.5  | 20                                   |
| Clinically symptomatic in-stent stenosis                                                     | 4    | 16.7 | 20                                   |
| Time to in-stent stenosis, average (mo)                                                      | 5    |      | 19                                   |
| Stent occlusion                                                                              | 4    | 0.6  | 19                                   |
| Clinically symptomatic in-stent occlusion                                                    | 1    | 25.0 | 19                                   |
| Time to occlusion, average (mo)                                                              | 8    |      | 19                                   |
| Follow-up: clinical                                                                          |      |      |                                      |
| No. patients with clinical follow-up                                                         | 736  |      | 27                                   |
| Average clinical follow-up (mo)                                                              | 13   |      | 25                                   |
| Median clinical follow-up (mo)                                                               | 6    |      | 21                                   |
| Follow-up death                                                                              | 4    | 0.7  | 22                                   |
| Follow-up TIA or stroke in the relevant brain territory                                      | 21   | 3.2  | 23                                   |
| Average time to TIA or stroke (mo)                                                           | 1    |      | 22                                   |

**Note:**—s/p indicates status-post
